# Supplementary material
Source: Royal Society of Chemistry journal article supplement (doi:10.1039/d6ja00147e)
Supplement: d6ja00147e1.pdf [file d6ja00147e1.pdf]

## **Electronic Supplementary Information (ESI)**

### **SP-IM and SP-SP: two potential natural sphalerite reference materials for in situ Zn and S isotope analysis by LA-MC-ICP-MS**

Xianli Zeng<sup>1</sup>, Ce Li<sup>2\*</sup>, Yidong Dai<sup>1</sup>, Xiaohu Xuan<sup>1</sup>, Zhaochu Hu<sup>1</sup>, Lanping Feng<sup>1</sup>, Tao Luo<sup>1</sup>, Zhenyan Liu<sup>1</sup>, Wen Zhang<sup>1\*</sup>

<sup>1</sup>State Key Laboratory of Geological Processes and Mineral Resources, China University of Geosciences, Wuhan 430074, China

<sup>2</sup>Hubei Geological Research Laboratory, Wuhan 430034, PR China

\*Author to whom correspondence should be sent.

E-mail: tuyaken@hotmail.com, cxbds@126.com

Tel. : +86 27 61055600, Fax. : +86 27 67885096

*Submitted to Journal of Analytical Atomic Spectrometry*

## Supplementary Information

**Table S1.** Trace element compositions of SP-IM and SP-SP determined by LA-ICP-MS

|                | <b>Cr</b>     | <b>Mn</b>     | <b>Fe</b>      | <b>Co</b>    | <b>Ni</b>     | <b>Cu</b>     | <b>Cd</b>      | <b>Sn</b>     |
|----------------|---------------|---------------|----------------|--------------|---------------|---------------|----------------|---------------|
|                | <b>ppm</b>    | <b>ppm</b>    | <b>ppm</b>     | <b>ppm</b>   | <b>ppm</b>    | <b>ppm</b>    | <b>ppm</b>     | <b>ppm</b>    |
| SP-IM-1        | 0.00          | 153.52        | 1413.79        | 0.03         | 0.01          | 3.71          | 1337.57        | 1.15          |
| SP-IM-2        | 0.00          | 153.07        | 1472.10        | 0.01         | 0.02          | 6.33          | 1340.98        | 1.32          |
| SP-IM-3        | 0.07          | 154.21        | 1510.11        | 0.05         | 0.02          | 5.57          | 1249.85        | 1.55          |
| SP-IM-4        | 0.01          | 150.94        | 1390.85        | 0.02         | 0.00          | 4.53          | 1281.46        | 1.43          |
| SP-IM-5        | 0.21          | 131.89        | 1256.69        | 0.00         | 0.02          | 3.69          | 1317.81        | 1.44          |
| SP-IM-6        | 0.00          | 126.45        | 1188.09        | 0.01         | 0.00          | 3.08          | 1261.04        | 1.62          |
| SP-IM-7        | 0.00          | 123.40        | 1146.37        | 0.03         | 0.01          | 5.15          | 999.36         | 2.76          |
| SP-IM-8        | 0.00          | 117.11        | 1266.06        | 0.03         | 0.01          | 3.52          | 1005.66        | 1.67          |
| SP-IM-9        | 0.06          | 120.75        | 1258.42        | 0.02         | 0.05          | 3.13          | 1037.17        | 1.73          |
| SP-IM-10       | 0.00          | 120.58        | 1274.01        | 0.09         | 0.00          | 3.29          | 1018.39        | 1.08          |
| SP-IM-11       | 0.07          | 127.61        | 1254.66        | 0.04         | 0.02          | 4.82          | 1135.82        | 1.23          |
| SP-IM-12       | 0.04          | 119.36        | 1234.29        | 0.03         | 0.05          | 3.94          | 1041.79        | 1.35          |
| SP-IM-12       | 0.07          | 115.74        | 1252.15        | 0.04         | 0.04          | 4.25          | 1010.80        | 1.32          |
| SP-IM-14       | 0.00          | 94.43         | 1064.57        | 0.02         | 0.06          | 3.94          | 1042.94        | 1.57          |
| SP-IM-15       | 0.00          | 102.30        | 1128.36        | 0.02         | 0.00          | 3.77          | 928.87         | 1.26          |
| SP-IM-16       | 0.05          | 105.89        | 1173.75        | 0.00         | 0.04          | 4.34          | 879.94         | 1.33          |
| SP-IM-17       | 0.04          | 107.29        | 1144.34        | 0.00         | 0.10          | 3.85          | 822.37         | 1.46          |
| SP-IM-18       | 0.00          | 73.12         | 819.47         | 0.01         | 0.02          | 2.82          | 791.49         | 1.19          |
| SP-IM-19       | 0.00          | 58.44         | 652.39         | 0.06         | 0.00          | 4.16          | 757.25         | 1.00          |
| SP-IM-20       | 0.00          | 52.94         | 635.74         | 0.01         | 0.00          | 3.03          | 714.13         | 1.31          |
| <b>Mean</b>    | <b>0.03</b>   | <b>115.45</b> | <b>1176.81</b> | <b>0.03</b>  | <b>0.02</b>   | <b>4.05</b>   | <b>1048.73</b> | <b>1.44</b>   |
| <b>RSD (%)</b> | <b>158.97</b> | <b>24.52</b>  | <b>19.55</b>   | <b>76.23</b> | <b>108.45</b> | <b>21.56</b>  | <b>18.50</b>   | <b>24.81</b>  |
| SP-SP-1        | 0.20          | 1.03          | 752.91         | 24.03        | 0.25          | 81.51         | 4752.45        | 6.49          |
| SP-SP-2        | 0.00          | 1.07          | 738.41         | 25.97        | 0.22          | 4.68          | 5056.94        | 1.44          |
| SP-SP-3        | 0.07          | 1.07          | 717.19         | 25.61        | 0.24          | 4.84          | 4977.32        | 1.35          |
| SP-SP-4        | 0.00          | 0.95          | 693.56         | 25.91        | 0.27          | 4.22          | 4727.92        | 1.53          |
| SP-SP-5        | 0.00          | 1.24          | 733.23         | 26.02        | 0.35          | 4.65          | 4717.10        | 1.26          |
| SP-SP-6        | 0.00          | 1.03          | 734.16         | 25.08        | 0.27          | 69.75         | 4091.90        | 16.54         |
| SP-SP-7        | 0.15          | 1.18          | 772.13         | 27.37        | 0.21          | 3.89          | 4716.49        | 1.37          |
| SP-SP-8        | 0.10          | 1.16          | 707.70         | 24.60        | 0.26          | 2.95          | 4893.40        | 1.18          |
| SP-SP-9        | 0.12          | 0.91          | 706.66         | 22.34        | 0.39          | 2.88          | 5047.85        | 1.37          |
| SP-SP-10       | 0.14          | 1.05          | 732.48         | 19.39        | 0.20          | 3.05          | 5218.78        | 1.12          |
| SP-SP-11       | 0.00          | 1.06          | 803.66         | 27.44        | 0.28          | 25.85         | 4707.92        | 3.61          |
| SP-SP-12       | 0.05          | 1.05          | 773.96         | 25.56        | 0.29          | 3.59          | 5238.75        | 1.90          |
| SP-SP-13       | 0.10          | 1.12          | 793.73         | 20.73        | 0.25          | 2.98          | 5319.19        | 1.66          |
| SP-SP-14       | 0.06          | 1.05          | 709.65         | 17.12        | 0.16          | 77.63         | 4162.23        | 3.21          |
| SP-SP-15       | 0.00          | 1.10          | 742.23         | 16.86        | 0.16          | 4.86          | 4668.96        | 1.49          |
| SP-SP-16       | 0.08          | 1.18          | 658.26         | 15.56        | 0.14          | 13.88         | 4360.24        | 1.97          |
| SP-SP-17       | 0.08          | 0.96          | 679.27         | 14.10        | 0.18          | 17.33         | 4391.85        | 1.61          |
| SP-SP-18       | 0.16          | 0.93          | 589.39         | 13.59        | 0.11          | 44.54         | 4219.53        | 2.83          |
| SP-SP-19       | 0.15          | 0.75          | 612.23         | 13.46        | 0.25          | 19.80         | 4139.71        | 1.99          |
| SP-SP-20       | 0.05          | 0.83          | 554.78         | 11.23        | 0.20          | 93.77         | 3564.94        | 3.35          |
| <b>Mean</b>    | <b>0.08</b>   | <b>1.04</b>   | <b>710.28</b>  | <b>21.10</b> | <b>0.23</b>   | <b>24.33</b>  | <b>4648.67</b> | <b>2.86</b>   |
| <b>RSD (%)</b> | <b>82.20</b>  | <b>11.33</b>  | <b>8.97</b>    | <b>25.02</b> | <b>28.12</b>  | <b>123.96</b> | <b>9.57</b>    | <b>117.77</b> |

**Table S2.** Results of  $\delta^{34}\text{S}_{\text{V-CDT}}$  (‰) in SP-IM and SP-SP using EA-IRMS.

| Sample | Raw data | Average | 2SD  | Number |
|--------|----------|---------|------|--------|
| SP-IM  | -1.82    |         |      |        |
| SP-IM  | -1.84    | -1.94   | 0.22 | 4      |
| SP-IM  | -2.04    |         |      |        |
| SP-IM  | -2.06    |         |      |        |
| SP-SP  | 3.78     |         |      |        |
| SP-SP  | 3.72     | 3.78    | 0.08 | 4      |
| SP-SP  | 3.83     |         |      |        |
| SP-SP  | 3.79     |         |      |        |
